# Supplementary material for: A microscale system for in situ investigation of immobilized microalgal cell resistance against liquid flow in the early inoculation stage
Source: Royal Society of Chemistry journal article supplement (doi:10.1039/d3lc00415e), 2023-01-01
Supplement: d3lc00415e1.pdf [file d3lc00415e1.pdf]

**A Microscale System for In-situ Investigation of Immobilized Microalgal Cell  
Resistance against Liquid Flow in the Early Inoculation Stage**

C. Y. Tong<sup>1</sup>, Huai Z. Li<sup>\*2</sup>, C. J. C. Derek<sup>\*1</sup>

<sup>1</sup>School of Chemical Engineering, Engineering Campus, Universiti Sains Malaysia,  
14300 Nibong Tebal, Penang, Malaysia

<sup>2</sup>Laboratory of Reactions and Process Engineering, University of Lorraine, CNRS, 1, rue  
Grandville, BP 20451, 54001 Nancy cedex, France

\*Corresponding author:

Tel: +33 383 175 109

Fax: +33 383 322 975

E-mail address: [Huai-Zhi.Li@univ-lorraine.fr](mailto:Huai-Zhi.Li@univ-lorraine.fr)

Tel: +60 4-599-6414

Fax: +60 4-599-6908

E-mail address: [chderekchan@usm.my](mailto:chderekchan@usm.my)

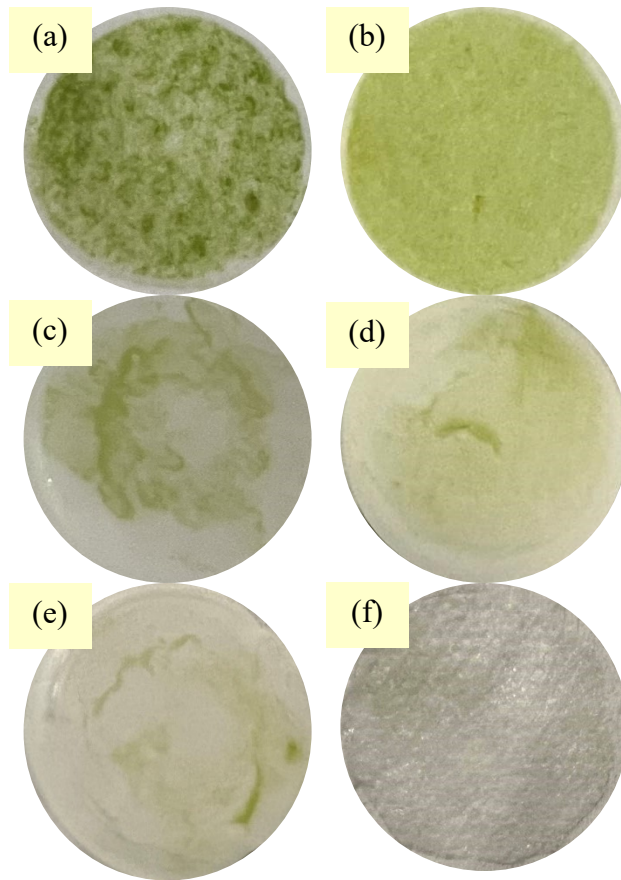

**Fig. S1** *C. vulgaris* cells remained on different types of solid supports after gentle rinsing with distilled water: (a) plain printing paper, (b) laboratory filter paper, (c) 0.45  $\mu\text{m}$  cellulose acetate membrane filter, (d) 0.22  $\mu\text{m}$  polyethylene membrane filter, (e) 0.1  $\mu\text{m}$  polyvinylidene fluoride membrane filter, and (f) filter layer of surgical masks. Algal cells had low attachment efficiency on all the membrane filters and mask filter, so the cells were easily drifted out from the solid supports. Plain printing paper was eventually selected as it was extensively used as a main carrier of immobilized microalgae in previous studies<sup>1-4</sup>.

| Parameters              | Unit                 | Value                   |
|-------------------------|----------------------|-------------------------|
| <b><u>Mesh</u></b>      |                      |                         |
| Sequence type           | -                    | Physics-controlled mesh |
| Element size            | -                    | Coarser                 |
| <b><u>Fluid</u></b>     |                      |                         |
| Type                    | -                    | Fresh BG11 medium       |
| Characteristics         | -                    | Newtonian               |
| Compressibility         | -                    | Incompressible          |
| Turbulence model type   | -                    | None                    |
| Density                 | kg m <sup>-3</sup>   | 1,000                   |
| Viscosity               | Pa · s               | 0.001                   |
| Environment temperature | K                    | 293.15                  |
| Fluid inlet velocity    | μL min <sup>-1</sup> | 5, 50, 500, and 1,000   |

**Table S2** Key input parameters used in computational fluid dynamics analysis.

## References

1. T. Naumann, Z. Çebi, B. Podola and M. Melkonian, Growing microalgae as aquaculture feeds on twin-layers: a novel solid-state photobioreactor, *J. Appl. Phycol.*, 2012, **25**, 1413-1420.
2. L. K. P. Schultze, M.-V. Simon, T. Li, D. Langenbach, B. Podola and M. Melkonian, High light and carbon dioxide optimize surface productivity in a twin-layer biofilm photobioreactor, *Algal Res.*, 2015, **8**, 37-44.
3. R. M. Benstein, Z. Çebi, B. Podola and M. Melkonian, Immobilized growth of the peridinin-producing marine dinoflagellate *Symbiodinium* in a simple biofilm photobioreactor, *Marine Biotechnology*, 2014, **16**, 621-628.
4. H.-D. Tran, T.-T. Do, L. Le, M.-L. Nguyen, C.-H. Pham and M. Melkonian, Cultivation of *Haematococcus pluvialis* for astaxanthin production on angled bench-scale and large-scale biofilm-based photobioreactors, *Vietnam Journal of Science, Technology and Engineering*, 2019, **61**, 61-70.
